# Supplementary material for: Design of sulfonimide anions for rechargeable lithium batteries
Source: Royal Society of Chemistry journal article supplement (doi:10.1039/d4cc03759f), 2024-01-01
Supplement: d4cc03759f1.pdf [file d4cc03759f1.pdf]

Supporting Information for

**Design of sulfonimide anions for rechargeable lithium  
batteries**

Xingxing Wang, Wenfang Feng, Zhibin Zhou, and Heng Zhang\*

---

*Key Laboratory of Material Chemistry for Energy Conversion and Storage (Ministry of Education)*

*School of Chemistry and Chemical Engineering, Huazhong University of Science and Technology*

*1037 Luoyu Road, Wuhan 430074, China*

**Corresponding Authors**

\*H. Zhang: E-mail: [hengzhang2020@hust.edu.cn](mailto:hengzhang2020@hust.edu.cn).

Table S1. Summarization of historical development of sulfonimide anions utilized as rechargeable lithium batteries.

| Entry | Year | Abbreviation                                              | Sulfonimide anion                                                                                                           | Ref. |
|-------|------|-----------------------------------------------------------|-----------------------------------------------------------------------------------------------------------------------------|------|
| 1     | 1962 | HFSI                                                      | $[(\text{FSO}_2)_2\text{N}]\text{H}$                                                                                        | 1    |
|       |      | AgFSI                                                     | $[(\text{FSO}_2)_2\text{N}]\text{Ag}$                                                                                       |      |
| 2     | 1965 | KFSI                                                      | $[(\text{FSO}_2)_2\text{N}]\text{K}$                                                                                        | 2    |
|       |      | RbFSI                                                     | $[(\text{FSO}_2)_2\text{N}]\text{Rb}$                                                                                       |      |
|       |      | CsFSI                                                     | $[(\text{FSO}_2)_2\text{N}]\text{Cs}$                                                                                       |      |
| 3     | 1972 | HTFSI                                                     | $[(\text{CF}_3\text{SO}_2)_2\text{N}]\text{H}$                                                                              | 3    |
| 4     | 1983 | NaTFSI                                                    | $[(\text{CF}_3\text{SO}_2)_2\text{N}]\text{Na}$                                                                             | 4    |
| 5     | 1989 | HTNFSI                                                    | $[(\text{CF}_3\text{SO}_2)(n\text{-C}_4\text{F}_9\text{SO}_2)\text{N}]\text{H}$                                             | 5    |
|       |      | AgTNFSI                                                   | $[(\text{CF}_3\text{SO}_2)(n\text{-C}_4\text{F}_9\text{SO}_2)\text{N}]\text{Ag}$                                            |      |
| 6     | 1990 | KTNFSI                                                    | $[(\text{CF}_3\text{SO}_2)(n\text{-C}_4\text{F}_9\text{SO}_2)\text{N}]\text{K}$                                             | 6    |
|       |      | CsTNFSI                                                   | $[(\text{CF}_3\text{SO}_2)(n\text{-C}_4\text{F}_9\text{SO}_2)\text{N}]\text{Cs}$                                            |      |
| 7     | 1992 | Substituent                                               | $=\text{NSO}_2\text{CF}_3$                                                                                                  | 7    |
|       |      |                                                           | $[(\text{CF}_3\text{CF}_2\text{SO}_2)_2\text{N}]\text{H}$                                                                   |      |
|       |      |                                                           | $[(\text{CF}_3\text{CF}_2\text{SO}_2)(\text{CF}_3\text{SO}_2)\text{N}]\text{H}$                                             |      |
|       |      |                                                           | $[(\text{CF}_3\text{CF}_2\text{CF}_2\text{SO}_2)_2\text{N}]\text{H}$                                                        |      |
| 8     | 1993 |                                                           | $[(\text{CF}_3\text{SO}_2)(\text{CF}_3\text{CF}_2\text{CF}_2\text{SO}_2)\text{N}]\text{H}$                                  | 8    |
|       |      |                                                           | $[(\text{CF}_3\text{SO}_2)(\text{CFCl}=\text{CF}_2\text{CF}_2\text{SO}_2)\text{N}]\text{H}$                                 |      |
|       |      |                                                           | $[(\text{CF}_3\text{SO}_2)(\text{CF}_2=\text{CFC}_2\text{F}_4\text{SO}_2)\text{N}]\text{H}$                                 |      |
|       |      |                                                           | $[(\text{CF}_3\text{CCl}_2\text{SO}_2)_2\text{N}]\text{H}$                                                                  |      |
| 9     | 1995 | LiFSI                                                     | $[(\text{FSO}_2)_2\text{N}]\text{Li}$                                                                                       | 9    |
|       |      | LiTFSI                                                    | $[(\text{CF}_3\text{SO}_2)_2\text{N}]\text{Li}$                                                                             |      |
| 10    | 1997 | LiBETI                                                    | $[(\text{CF}_3\text{CF}_2\text{SO}_2)_2\text{N}]\text{Li}$                                                                  | 10   |
|       |      |                                                           | $[(\text{CF}_3\text{CH}_2\text{OSO}_2)_2\text{N}]\text{H}$                                                                  |      |
| 11    | 1997 |                                                           | $[(\text{CF}_3\text{CF}_2\text{CH}_2\text{OSO}_2)_2\text{N}]\text{H}$                                                       | 11   |
|       |      |                                                           | $[(\text{HCF}_2\text{CF}_2\text{CH}_2\text{OSO}_2)_2\text{N}]\text{H}$                                                      |      |
|       |      |                                                           | $[(\text{CF}_3)_2\text{CHSO}_2)_2\text{N}]\text{H}$                                                                         |      |
|       |      |                                                           | $[(\text{CF}_3\text{SO}_2)(n\text{-C}_4\text{F}_9\text{SO}_2)\text{N}]\text{Li}$                                            |      |
|       |      |                                                           | $[(\text{CF}_3\text{SO}_2)(\text{C}_6\text{F}_5\text{SO}_2)\text{N}]\text{Li}$                                              |      |
|       |      |                                                           | $[(\text{CF}_3\text{SO}_2)(n\text{-C}_8\text{F}_{17}\text{SO}_2)\text{N}]\text{Li}$                                         |      |
| 12    | 1997 |                                                           | $[(\text{CF}_3\text{CHOSO}_2)_2\text{N}]\text{Li}$                                                                          | 12   |
|       |      |                                                           | $[(\text{CF}_3\text{CF}_2\text{CHOSO}_2)_2\text{N}]\text{Li}$                                                               |      |
|       |      |                                                           | $[(\text{HCF}_2\text{CF}_2\text{CHOSO}_2)_2\text{N}]\text{Li}$                                                              |      |
|       |      |                                                           | $[(\text{CF}_3)_2\text{CHOSO}_2)_2\text{N}]\text{Li}$                                                                       |      |
| 13    | 2002 | $(\text{CF}_3\text{SO}_2)(\text{CF}_3\text{SO})\text{NM}$ | $[(\text{CF}_3\text{SO}_2)(\text{CF}_3\text{SO})\text{N}]\text{K}$                                                          | 13   |
|       |      |                                                           | $[(\text{CF}_3\text{SO}_2)(\text{CF}_3\text{SO})\text{N}]\text{Cs}$                                                         |      |
|       |      |                                                           | $[\text{C}_6\text{H}_5\text{SO}(\text{NSO}_2\text{CF}_3)_2\text{N}]\text{K}$                                                |      |
| 14    | 2005 |                                                           | $[(\text{C}_6\text{H}_5\text{SO}(\text{NSO}_2\text{CF}_3))(\text{CF}_3\text{SO}(\text{NSO}_2\text{CF}_3))\text{N}]\text{K}$ | 14   |
|       |      |                                                           | $[\text{CF}_3\text{SO}(\text{NSO}_2\text{CF}_3)_2\text{N}]\text{K}$                                                         |      |
|       |      |                                                           | $[(\text{CF}_3\text{SO}_2)(\text{CF}_3\text{SO}(\text{NSO}_2\text{CF}_3))\text{N}]\text{K}$                                 |      |
|       |      | LiFPFSI                                                   | $[(\text{FSO}_2)(\text{C}_2\text{F}_5\text{SO}_2)\text{N}]\text{Li}$                                                        |      |
|       |      | NaFPFSI                                                   | $[(\text{FSO}_2)(\text{C}_2\text{F}_5\text{SO}_2)\text{N}]\text{Na}$                                                        |      |
| 15    | 2010 | KFPFSI                                                    | $[(\text{FSO}_2)(\text{C}_2\text{F}_5\text{SO}_2)\text{N}]\text{K}$                                                         | 15   |
|       |      | RbFPFSI                                                   | $[(\text{FSO}_2)(\text{C}_2\text{F}_5\text{SO}_2)\text{N}]\text{Rb}$                                                        |      |
|       |      | CsFPFSI                                                   | $[(\text{FSO}_2)(\text{C}_2\text{F}_5\text{SO}_2)\text{N}]\text{Cs}$                                                        |      |
| 16    | 2011 | LiFNFSI                                                   | $[(\text{FSO}_2)(n\text{-C}_4\text{F}_9\text{SO}_2)\text{N}]\text{Li}$                                                      | 16   |
|       |      |                                                           | $[(\text{CF}_3\text{SO}_2)(\text{CH}_2=\text{CHC}_6\text{H}_4\text{SO}_2)\text{N}]\text{K}$                                 |      |
| 17    | 2011 | KSTFSI                                                    | $-(\text{CH}_2\text{CHX})_n-$ , X = $[(\text{C}_6\text{H}_4\text{SO}_2\text{N}^{(-)}(\text{Li})\text{SO}_2\text{CF}_3)]$ ,  | 17,  |
|       |      | LiPSTFSI                                                  | LiPSTFSI                                                                                                                    | 18   |

Table S1. Continued.

| Entry | Year | Abbreviation | Sulfonimide anion                                                           | Ref. |
|-------|------|--------------|-----------------------------------------------------------------------------|------|
| 18    | 2014 | LiTFESI      | $[(CF_3CH_2OSO_2)_2N]Li$                                                    | 19   |
|       |      | NaTFESI      | $[(CF_3CH_2OSO_2)_2N]Na$                                                    |      |
|       |      | KTFESI       | $[(CF_3CH_2OSO_2)_2N]K$                                                     |      |
|       |      | RbTFESI      | $[(CF_3CH_2OSO_2)_2N]Rb$                                                    |      |
|       |      | CsTFESI      | $[(CF_3CH_2OSO_2)_2N]Cs$                                                    |      |
| 19    | 2015 | LiSTFSI      | $[CF_3SO(=NSO_2CF_3)_2]Li$                                                  | 20   |
| 20    | 2016 | LiTNFSI      | $[(CF_3SO_2)(n-C_4F_9SO_2)N]Li$                                             | 21   |
| 21    | 2016 | KSSTFSI      | $[(CF_3SO(NSO_2CF_3))(CH_2=CHC_6H_4SO_2)N]K$                                | 22   |
|       |      | LiSSTFSI     | $[(CF_3SO(NSO_2CF_3))(CH_2=CHC_6H_4SO_2)N]Li$                               |      |
|       |      | LiPSSSTFSI   | $-(CH_2CHX)_n-$ , $X = C_6H_4SO_2N^{(-)}(Li)SO(NSO_2CF_3)CF_3$ , LiPSSSTFSI |      |
| 22    | 2018 | LiFTFSI      | $[(FSO_2)(CF_3SO_2)N]Li$                                                    | 23   |
| 23    | 2018 | LiFPFSI      | $[(FSO_2)(C_2F_5SO_2)N]Li$                                                  | 24   |
| 24    | 2019 | LiDFTFSI     | $[(CF_3SO_2)(CF_2HSO_2)N]Li$                                                | 25   |
| 25    | 2019 | LiEFA        | $[(CF_3SO_2)((CH_3OC_2H_4)_2NSO_2)N]Li$                                     | 26   |
| 26    | 2019 | LiFMTFSI     | $[(CF_3SO_2)(CFH_2SO_2)N]Li$                                                | 27   |
|       |      | LiDFFMSI     | $[(CHF_2SO_2)(CFH_2SO_2)N]Li$                                               |      |
|       |      | LiMTFSI      | $[(CF_3SO_2)(CH_3SO_2)N]Li$                                                 |      |
|       |      | LiFMSI       | $[(CH_2FSO_2)_2N]Li$                                                        |      |
|       |      | LiDFMSI      | $[(CH_3SO_2)(CF_2HSO_2)N]Li$                                                |      |
|       |      | LiFMMSI      | $[(CH_3SO_2)(CFH_2SO_2)N]Li$                                                |      |
| 27    | 2020 | LiMSI        | $[(CH_3SO_2)_2N]Li$                                                         | 28   |
|       |      | LiDFSI       | $[(CHF_2SO_2)_2N]Li$                                                        |      |
|       |      | LiDFMSI      | $[(CF_3SO_2)((CH_3)(C_2H_5)NSO_2)N]Li$                                      |      |
| 28    | 2022 | LiTFEMSI     | $[(CF_3SO_2)((CH_3)(C_2H_5)NSO_2)N]Li$                                      | 29   |
| 29    | 2022 | LiBTFSI      | $[(CF_3SO_2)(C_6H_5SO_2)N]Li$                                               | 30   |
|       |      | LiTPBTFSI    | $[(CF_3SO_2)(C_6H_2(CH(CH_3)_2)_3SO_2)N]Li$                                 |      |
| 30    | 2023 | LiNFSI       | $[(n-C_4F_9SO_2)_2N]Li$                                                     | 31   |

Abbreviations are given below: bis(fluorosulfonyl)imide  $\{[(FSO_2)_2N]H, HFSI\}$ , silver bis(fluorosulfonyl)imide  $\{[(FSO_2)_2N]Ag, AgFSI\}$ , potassium bis(fluorosulfonyl)imide  $\{[(FSO_2)_2N]K, KFSI\}$ , rubidium bis(fluorosulfonyl)imide  $\{[(FSO_2)_2N]Rb, RbFSI\}$ , cesium bis(fluorosulfonyl)imide  $\{[(FSO_2)_2N]Cs, CsFSI\}$ , bis(trifluoromethanesulfonyl)imide  $\{[(CF_3SO_2)_2N]H, HTFSI\}$ , sodium bis(trifluoromethanesulfonyl)imide  $\{[(CF_3SO_2)_2N]Na, NaTFESI\}$ , (trifluoromethanesulfonyl)(*n*-nonafluorobutanesulfonyl)imide  $\{[(CF_3SO_2)(n-C_4F_9SO_2)N]H, HTNFSI\}$ , silver (trifluoromethanesulfonyl)(*n*-nonafluorobutanesulfonyl)imide  $\{[(CF_3SO_2)(n-C_4F_9SO_2)N]Ag, AgTNFSI\}$ , potassium (trifluoromethanesulfonyl)(*n*-nonafluorobutanesulfonyl)imide  $\{[(CF_3SO_2)(n-C_4F_9SO_2)N]K, KTNFSI\}$ , cesium (trifluoromethanesulfonyl)(*n*-nonafluorobutanesulfonyl)imide  $\{[(CF_3SO_2)(n-C_4F_9SO_2)N]Cs, CsTNFSI\}$ , lithium bis(fluorosulfonyl)imide  $\{[(FSO_2)_2N]Li, LiFSI\}$ , lithium bis(trifluoromethanesulfonyl)imide  $\{[(CF_3SO_2)_2N]Li, LiTFSI\}$ , lithium bis(pentafluoroethanesulfonyl)imide  $\{[(CF_3CF_2SO_2)_2N]Li, LiBETI\}$ , lithium (fluorosulfonyl)(pentafluoroethanesulfonyl)imide  $\{[(FSO_2)(C_2F_5SO_2)N]Li, LiFPFSI\}$ , sodium (fluorosulfonyl)(pentafluoroethanesulfonyl)imide  $\{[(FSO_2)(C_2F_5SO_2)N]Na, NaFPFSI\}$ , potassium (fluorosulfonyl)(pentafluoroethanesulfonyl)imide  $\{[(FSO_2)(C_2F_5SO_2)N]K, KFPFSI\}$ , rubidium (fluorosulfonyl)(pentafluoroethanesulfonyl)imide  $\{[(FSO_2)(C_2F_5SO_2)N]Rb, RbFPFSI\}$ , cesium (fluorosulfonyl)(pentafluoroethanesulfonyl)imide  $\{[(FSO_2)(C_2F_5SO_2)N]Cs, CsFPFSI\}$ , lithium (fluorosulfonyl)(*n*-nonafluorobutanesulfonyl)imide  $\{[(FSO_2)(n-C_4F_9SO_2)N]Li, LiFNFSI\}$ , potassium (4-styrenesulfonyl)(trifluoromethylsulfonyl)imide  $\{[(CF_3SO_2)(CH_2=CHC_6H_4SO_2)N]K, KSTFSI\}$ , lithium poly[(4-styrenesulfonyl)(trifluoromethylsulfonyl)imide]  $[-(CH_2CHX)_n-, X = C_6H_4SO_2N^{(-)}(Li^+)SO_2CF_3; LiPSTFSI]$ , lithium bis(2,2,2-trifluoroethoxy-sulfonyl)imide  $\{[(CF_3CH_2OSO_2)_2N]Li, LiTFESI\}$ , sodium bis(2,2,2-trifluoroethoxy-

xysulfonyl)imide  $\{[(CF_3CH_2OSO_2)_2N]Na, NaTFESI\}$ , potassium bis(2,2,2-trifluoroethoxysulfonyl)imide  $\{[(CF_3CH_2OSO_2)_2N]K, KTFESI\}$ , rubidium bis(2,2,2-trifluoroethoxysulfonyl)imide  $\{[(CF_3CH_2OSO_2)_2N]Rb, RbTFESI\}$ , cesium bis(2,2,2-trifluoroethoxysulfonyl)imide  $\{[(CF_3CH_2OSO_2)_2N]Cs, CsTFESI\}$ , lithium (trifluoromethane(*S*-trifluoromethane sulfonylimino)sulfonyl)(trifluoromethanesulfonyl)imide  $\{[CF_3SO(=NSO_2CF_3)_2]Li, LiSTFSI\}$ , lithium (trifluoromethanesulfonyl)(*n*-nonafluorobutanesulfonyl)imide  $\{[(CF_3SO_2)(n-C_4F_9SO_2)N]Li, LiTNFSI\}$ , potassium [(4-styrenesulfonyl)(trifluoromethyl(*S*-trifluoromethylsulfonylimino)sulfonyl)imide]  $\{[(CF_3SO(NSO_2CF_3))(CH_2=CHC_6H_4SO_2)]NK, KSTFSI\}$ , lithium poly[(4-styrenesulfonyl)(trifluoromethyl(*S*-trifluoromethylsulfonylimino)sulfonyl)imide]  $[-(CH_2CHX)_n-$ ,  $X = [C_6H_4SO_2N^{(-)}(Li^+)SO(NSO_2CF_3)CF_3]$ ;  $LiPSsTFSI$ ], lithium (fluorosulfonyl)(trifluoromethanesulfonyl)imide  $\{[(FSO_2)(CF_3SO_2)N]Li, LiFTFSI\}$ , lithium (fluorosulfonyl)(pentafluoroethanesulfonyl)imide  $\{[(FSO_2)(C_2F_5SO_2)N]Li, LiFPFSI\}$ , lithium (difluoromethanesulfonyl)(trifluoromethanesulfonyl)imide  $\{[(CF_2HSO_2)(CF_3SO_2)N]Li, LiDFTFSI\}$ , lithium ether-functionalized anion  $\{[(CF_3SO_2)((CH_3OC_2H_4)_2NSO_2)N]Li, LiEFA\}$ , lithium (trifluoromethanesulfonyl)(*n*-heptafluoropropanesulfonyl)imide  $\{[(CF_3SO_2)(n-C_3F_7SO_2)N]Li, LiTPFSI\}$ , lithium bis(difluoromethanesulfonyl)imide  $\{[(HCF_2SO_2)_2N]Li, LiDFSi\}$ , lithium (fluoromethanesulfonyl)(trifluoromethanesulfonyl)imide  $\{[(CFH_2SO_2)(CF_3SO_2)N]Li, LiFMTFSI\}$ , lithium (difluoromethanesulfonyl)(fluoromethanesulfonyl)imide  $\{[(CF_2HSO_2)(CFH_2SO_2)N]Li, LiDFFMSI\}$ , lithium (methanesulfonyl)(trifluoromethanesulfonyl)imide  $\{[(CH_3SO_2)(CF_3SO_2)N]Li, LiMTFSI\}$ , lithium bis(fluoromethanesulfonyl)imide  $\{[(CFH_2SO_2)_2N]Li, LiFMSI\}$ , lithium (difluoromethanesulfonyl)(methanesulfonyl)imide  $\{[(CF_2HSO_2)(CH_3SO_2)N]Li, LiDFMSI\}$ , lithium (fluoromethanesulfonyl)(methanesulfonyl)imide  $\{[(CFH_2SO_2)(CH_3SO_2)N]Li, LiFMMSI\}$ , lithium bis(methanesulfonyl)imide  $\{[(CH_3SO_2)_2N]Li, LiMSI\}$ , lithium (trifluoromethanesulfonyl)(*N*-ethyl-*N*-methylsulfamoyl)imide  $\{[(CF_3SO_2)((CH_3)(C_2H_5)NSO_2)N]Li, LiTFEMSI\}$ , lithium (bis(1,1,1,3,3,3-hexafluoro-2-propoxyl)sulfonyl)imide,  $[(CF_3)_2CHOSO_2)_2N]Li, LiHFPSI\}$ , lithium (benzenesulfonyl)(trifluoromethanesulfonyl)imide  $\{[(CF_3SO_2)(C_6H_5SO_2)N]Li, LiBTFSI\}$ , lithium (2,4,6-triisopropylbenzenesulfonyl)(trifluoromethanesulfonyl)imide  $\{[(CF_3SO_2)(C_6H_2(CH(CH_3)_2)_3SO_2)N]Li, LiTPBTFSI\}$ , and lithium bis(*n*-nonafluorobutanesulfonyl)imide  $\{[(n-C_4F_9SO_2)N]Li, LiNFSI\}$ .

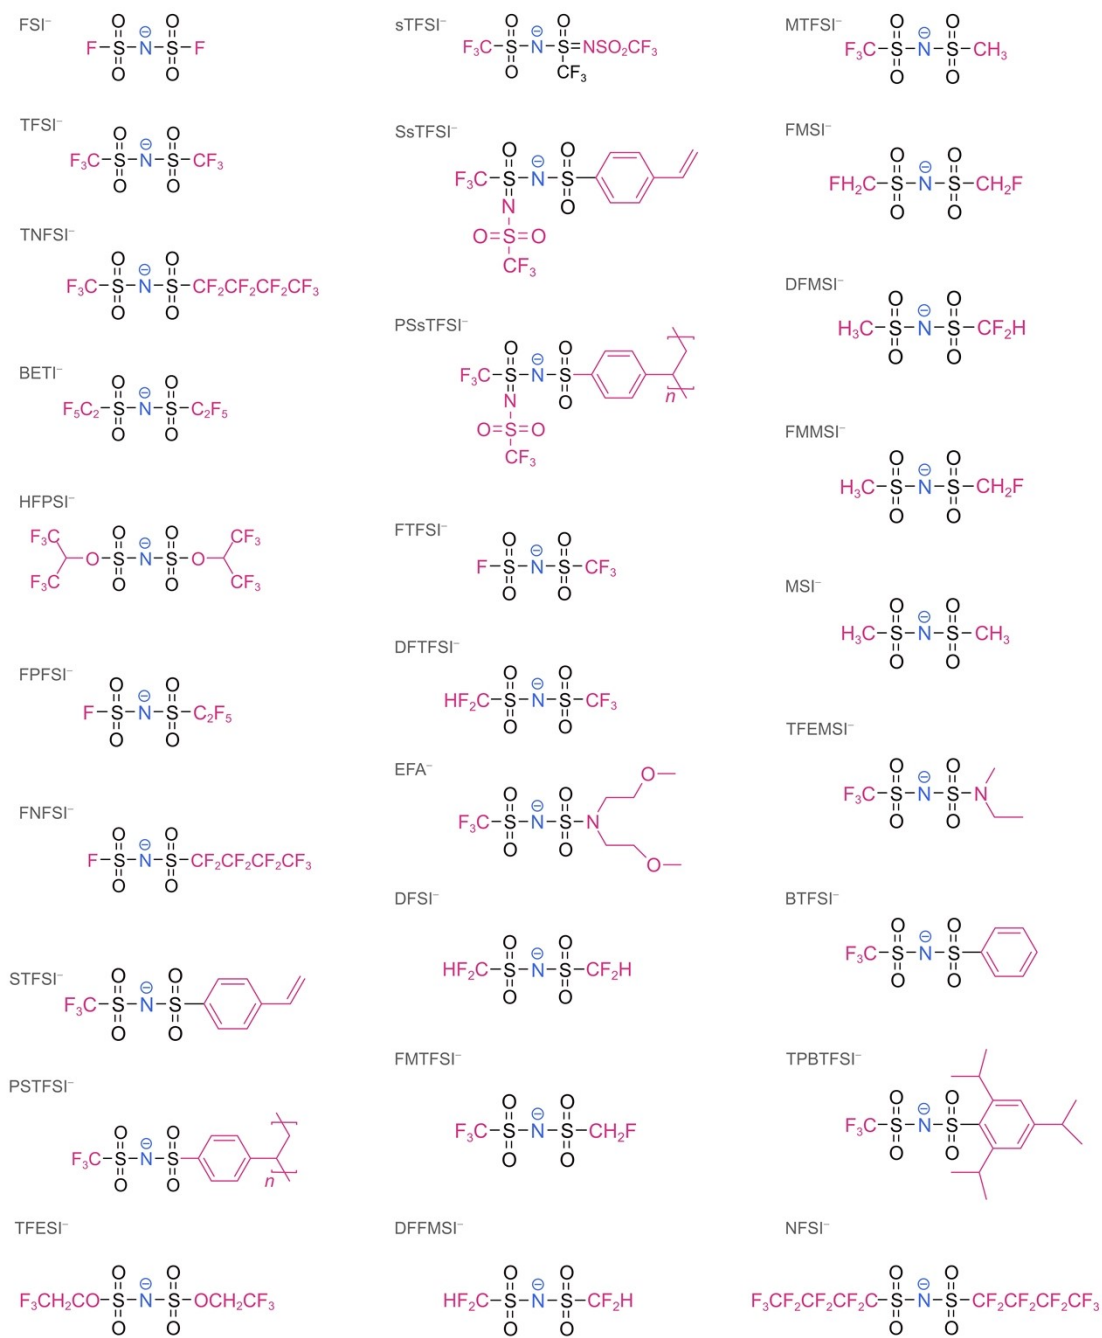

**Fig. S1** Chemical structures of the sulfonimide anions utilized as electrolyte materials.

## References

1. R. Appel and G. Eisenhauer, *Chem. Ber.*, 1962, **95**, 246–248.
2. J. K. Ruff, *Inorg. Chem.*, 1965, **4**, 1446–1449.
3. J. N. N. Meussdorffer, *Chem. Ztg.*, 1972, **96**, 582–583.
4. M. Armand. *FR2527602A1*, 1983.
5. M. Razaq, A. Razaq, E. Yeager, D. D. DesMarteau and S. Singh, *J. Electrochem. Soc.*, 1989, **136**, 385–390.
6. S. Singh and D. D. DesMarteau, *Inorg. Chem.*, 1990, **29**, 2982–2985.
7. L. M. Yagupolskii, R. Y. Garlyauskajte and N. V. Kondratenko, *Synthesis*, 1992, **1992**, 749–750.
8. L. Q. Hu and D. D. DesMarteau, *Inorg. Chem.*, 1993, **32**, 5007–5010.
9. C. Michot, M. Armand, J. Sanchez, Y. Choquette, M. Gau-thier, *WO9526056A1*, 1995.
10. L. J. Krause, W. Lamanna, J. Summerfield, M. Engle, G. Korba, R. Loch and R. Atanasoski, *J. Power Sources*, 1997, **68**, 320–325.
11. J. Nie, T. Sonoda and H. Kobayashi, *J. Fluorine Chem.*, 1998, **87**, 45–47.
12. F. Kita, A. Kawakami, J. Nie, T. Sonoda and H. Kobayashi, *J. Power Sources*, 1997, **68**, 307–310.
13. R. Y. Garlyauskayte, A. V. Bezdudny, C. Michot, M. Armand, Y. L. Yagupolskii and L. M. Yagupolskii, *J. Chem. Soc., Perkin Trans. 1*, 2002, 1887–1889.
14. R. Y. Garlyauskayte, A. N. Chernega, C. Michot, M. Armand, Y. L. Yagupolskii and L. M. Yagupolskii, *Org. Biomol. Chem.*, 2005, **3**, 2239–2243.
15. H.-B. Han, Y.-X. Zhou, K. Liu, J. Nie, X.-J. Huang, M. Armand and Z.-B. Zhou, *Chem. Lett.*, 2010, **39**, 472–474.
16. H. Han, J. Guo, D. Zhang, S. Feng, W. Feng, J. Nie and Z. Zhou, *Electrochem. Commun.*, 2011, **13**, 265–268.
17. R. Meziane, J.-P. Bonnet, M. Courty, K. Djellab and M. Armand, *Electrochim. Acta*, 2011, **57**, 14–19.
18. S. Feng, D. Shi, F. Liu, L. Zheng, J. Nie, W. Feng, X. Huang, M. Armand and Z. Zhou, *Electrochim. Acta*, 2013, **93**, 254–263.
19. H. Zhang, C.-Y. Liu, S.-Z. Gong, W.-F. Feng, F. Xu, J. Nie, Z.-B. Zhou. *Chem. J. Chinese U.*, 2014, **35**, 804–811.
20. H. Zhang, H. Han, X. Cheng, L. Zheng, P. Cheng, W. Feng, J. Nie, M. Armand, X. Huang and Z. Zhou, *J. Power Sources*, 2015, **296**, 142–149.
21. Q. Ma, X. Qi, B. Tong, Y. Zheng, W. Feng, J. Nie, Y.-S. Hu, H. Li, X. Huang, L. Chen and Z. Zhou, *ACS Appl. Mater. Interfaces*, 2016, **8**, 29705–29712.
22. Q. Ma, H. Zhang, C. Zhou, L. Zheng, P. Cheng, J. Nie, W. Feng, Y. S. Hu, H. Li, X. Huang, L. Chen, M. Armand and Z. Zhou, *Angew. Chem., Int. Ed.*, 2016, **55**, 2521–2525.
23. G. G. Eshetu, X. Judez, C. Li, M. Martinez-Ibanez, I. Gracia, O. Bondarchuk, J. Carrasco, L. M. Rodriguez-Martinez, H. Zhang and M. Armand, *J. Am. Chem. Soc.*, 2018, **140**, 9921–9933.

24. B. Tong, J. Wang, Z. Liu, L. Ma, Z. Zhou and Z. Peng, *J. Power Sources*, 2018, **384**, 80–85.
25. U. Oteo, M. Martínez-Ibañez, I. Aldalur, E. Sanchez-Diez, J. Carrasco, M. Armand and H. Zhang, *ChemElectroChem*, 2019, **6**, 1019–1022.
26. H. Zhang, F. Chen, O. Lakuntza, U. Oteo, L. Qiao, M. Martínez-Ibanez, H. Zhu, J. Carrasco, M. Forsyth and M. Armand, *Angew. Chem., Int. Ed.*, 2019, **58**, 12070–12075.
27. H. Zhang, U. Oteo, H. Zhu, X. Judez, M. Martínez-Ibanez, I. Aldalur, E. Sanchez-Diez, C. Li, J. Carrasco, M. Forsyth and M. Armand, *Angew. Chem., Int. Ed.*, 2019, **58**, 7829–7834.
28. L. Qiao, U. Oteo, Y. Zhang, S. R. Peña, M. Martínez-Ibañez, A. Santiago, R. Cid, L. Meabe, H. Manzano, J. Carrasco, H. Zhang and M. Armand, *Energy Storage Mater.*, 2020, **32**, 225–233.
29. M. Martínez-Ibañez, E. Sanchez-Diez, U. Oteo, I. Gracia, I. Aldalur, H. B. Eitouni, M. Joost, M. Armand and H. Zhang, *Chem. Mater.*, 2022, **34**, 3451–3460.
30. L. Qiao, S. Rodriguez Pena, M. Martínez-Ibanez, A. Santiago, I. Aldalur, E. Lobato, E. Sanchez-Diez, Y. Zhang, H. Manzano, H. Zhu, M. Forsyth, M. Armand, J. Carrasco and H. Zhang, *J. Am. Chem. Soc.*, 2022, **144**, 9806–9816.
31. B. Tong, Z. Song, W. Feng, J. Zhu, H. Yu, X. Huang, M. Armand, Z. Zhou and H. Zhang, *Adv. Energy Mater.*, 2023, **13**, 2204085.
